# Supplementary material for: Envelope-specific B-cell populations in African green monkeys chronically infected with simian immunodeficiency virus
Source: PubMed Central journal article supplement (PMC4935802; doi:10.1038/ncomms12131), 2016-07-06
Supplement: ncomms12131-s1.pdf [file ncomms12131-s1.pdf]

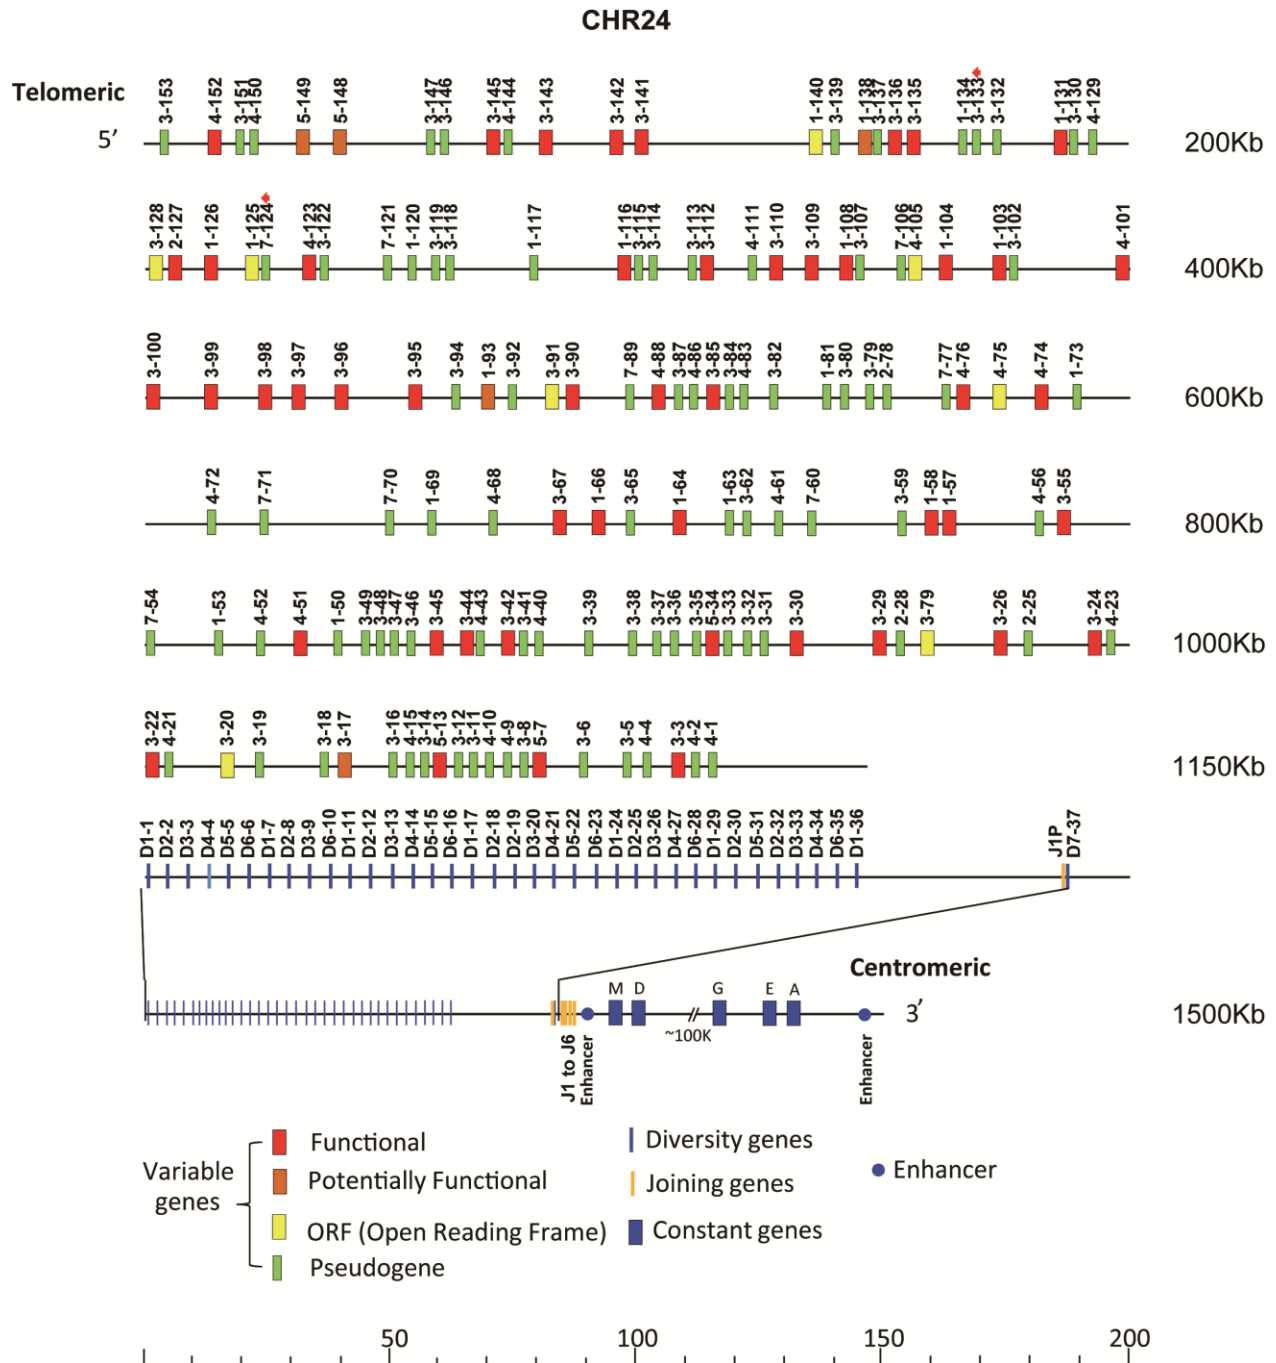

**Supplementary Figure 1 Map of AGM (*Chlorocebus sabaeus*) immunoglobulin heavy chain locus on chromosome (CHR) 24.** Representation of the identified functional and potentially functional, open reading frames, and pseudogenes of AGM  $V_H$ ,  $D_H$  and  $J_H$  germline segments along with the Ig constant region genes of Ig M, D, G, A and E located on CHR24. Four additional functional AGM  $V_H$  gene segments that were identified from the unassembled contigs are not showed here (see Supplementary Data 1).

a

```

                                     50                                     100
                                     |                                     |
HuIgG1  ASTKGPSVFPLAPSSKSTSGGTAALGCLVKDYFPEPVTVSWNSGALTSQVHTFPAVLQSSGLYSLSSVTVTPSSSLGTQTYICNVNHKPSNTKVKDKKVE-
RhIgG1  .....R...ES.....S.....V.....R..I
AGMIgG1 .....R..ES.....S.....T.....R..I
HuIgG2 .....C.R..ES.....NF.....T..D.....T..R
RhIgG2 .....SC.R..QS.....Q.....V..V.E.....T.GL
AGMIgG2 -----
HuIgG3 .....C.R.....T.....R..L
HuIgG4 .....C.R..ES.....K..T..D.....R..S
RhIgG3 .....SC.R..QS.....V..V.E.....R..F
RhIgG4 .....S..R..ES.....V..V.E.....R..F

                                     200
                                     |
HuIgG1  -----FKSCDKTHTCPCPAPELLGGPSVFLFPPPKPKDTLMISRTPEVTCVVVDVSHED
RhIgG1  KTCG-----GGG.PP.....Q..
AGMIgG1 KTCG-----GGG.PP.....N.....Q..
HuIgG2 -----C---VE-----PVA.....
RhIgG2 PCR-----S.....Q..E
AGMIgG2 -----Q..E
HuIgG3 KTPLGDTTHTCPRCPEPKSCDTPPPCPRCPEPKSCDTPPPCPRCPE...TPPP..R.....
HuIgG4 -----YG---PP..S...F.....Q..
RhIgG3 TPPC-----GDTT-PP.....Q..
RhIgG4 TP-----P.....Q..

                                     250                                     300
                                     |                                     |
HuIgG1  PEVKFNWYVDGVEVHNAKTKPREEQYNSTYRVVSVLTVLHQDWLNGKEYKCKVSNKALPAPIEKTISKAKGQPREPQVYTLPPSRDELTKNQVSLTCLVK
RhIgG1  .D.....N.A..H.Q...T.....T.....Q..D.....E.....
AGMIgG1 ..Q.....Q.....T.....R.....T.....Q..D.....A..E.....
HuIgG2 ..Q.....F..F.....V.....G.....T.....E.M.....
RhIgG2 .D.....Q.....F.....T.....T.....RQ..V..T.....P.E.....
AGMIgG2 ..Q.....Q.....N.....T.....T.....RQ..V..T.....P.E.....I.
HuIgG3 ..Q..K.....F.....T.....T.....E.M.....
HuIgG4 ..Q.....F.....G..SS.....QE.M.....
RhIgG3 ..Q.....A..H.Q...R.F.....T.....T.....G.....I..PQE.....T
RhIgG4 ..Q.....Q.....R.F.....T.....T.....G.....I..PQE.....T

                                     350
                                     |
HuIgG1  GFYPSDIAVEWESNGQPENNYKTTTPVLDSDGSFFLYSKLTVDKSRWQQGNVFCSCVMHEALHNHYTQKSLSLSPGK
RhIgG1  .....V.....S.....T.....Y.....
AGMIgG1 .....V.....T.....Y.....T.....V.....
HuIgG2 .....M.....
RhIgG2 .....V..A.....T.....Y.....T.....
AGMIgG2 .....V.....R.....T.....Y.....T.....V.....
HuIgG3 .....S.....N..M.....I.....RF.....
HuIgG4 .....R.....E.....L.....
RhIgG3 .....T.....Y.....T.....
RhIgG4 .....T.....YL.....N.....P..I..T.....
```

b

```

                    50                                     100
HuIgA1      SPTSPKVFPLSLCSTQPDGNVVIACLVQGFPPQEPPLSVTWSESGQGVARNFPSPQDASGDLYTTSSQLTLPATQCLAGKSVTCHVKHYTNPSQDVTVPC
HuIgA2      .....D.PQ.....V.....N.....PD.....
RMiGA_AI    ...K.....EG.S~.V.....K.N..K.A..VI..R...G.....A.P.SE.....E...R...A...
RMiGA_AII   ..R.....EG.S~.V.....N...K.A..VI..R...G.....A.P.SE.....E...R...G...
RMiGA_BI    ...R.....N...S~.V.....N...K.A..VI..R...G.....A.P.SE.....E...A...
RMiGA_BII   ..R.....S~.....N...K.A..VI..R...G.....A.P.SE.....E...A...
RMiGA_CI    ...R.....N...S~.V.....N...K.AD.VI..R...G.....A.P.SE.....E...A...
RMiGA_CII   ..R.....EG.S~.V.....N...K.A..VI..R...G.....A.P.SE.....E...AR..A...
RMiGA_DI    ..R.....EG.S~.V.....N...K.A..VI..R...G.....A.P.SE.....E...R...G...
RMiGA_DII   ..R.....EG.S~.V.....N...K.A..VI..R...G.....A.P.SE.....E...AR..A...
RMiGA_RJZ7  .....KG.S...V.....N..NK.A..VI.....G.....P.TE.....E.....A.R...
RMiGA_RUA8  .....N...S~.V.....N...K.AD.VI..R...G.....A.P.SE.....E...A...
AGMiGA     .....EG.S...V.....N...KN.E~~VI...A..G.....A.P.SE...R.E.....A...

```

```

                    150                                     200
Hinge region
HuIgA1      PVPSTPPPTSPSTPPPTSPSPSCCHPRLSLHRPALEDLLLGSEANLTCTLTGLRDASGVFTTWTTPSSGKSAVQGPPEPRLCGCYSVSSVLPGCAEPWNHGKT
HuIgA2      .....P.P.....A.....Q.....E...
RMiGA_AI    R~VPP.KC.-----LK.DK...R.....P.A.....N...QS.H.P.....NRV...
RMiGA_AII   R~VPP.NCR-----L.DK...R.....P.A.A.....N...QS.H.P.....NRV...
RMiGA_BI    VP.I..C.-----E...R.....K.P.A.....N...QS.K.P.....NRE...
RMiGA_BII   V~QPK.CL-----DK...R.....P.A.....N...QS.H.P.....NRV...
RMiGA_CI    VP.I..C.-----E...R.....P.A.....N...QS.K.P.....NRE...
RMiGA_CII   V~SQ.K.CL-----DE...R.....P.A.....N...QS.K.P.....NRV...
RMiGA_DI    R~VPP.NCR-----L.DK...R.....P.A.A.....N...QS.H.P.....NRV...
RMiGA_DII   V~SQ.K.CL-----DE...R.....P.A.....N...QS.K.P.....NRV...
RMiGA_RJZ7  RD.QPK.CL-----DK.Q...R.....P.A.A.....N...QS.H.P.....NRE...
RMiGA_RUA8  VP.I..C.-----E...R.....K.P.A.....N...QS.K.P.....NRE...
AGMiGA     V~.PKTCF-----DE...R.....P.A.....N...QS.H.P.....N.V...

```

```

                    250                                     300
HuIgA1      FTCTAAYPESKTPLTATLSKSGNTFRPEVHLLPPPSEELANLNLVTLTCLARGFSPKDVLRWLQGSQELPREKYLTVASRQEPSQGTTFFAVTSILRVA
HuIgA2      .....H.L.....NIT.....
RMiGA_AI    ...EH.LE.Q...I.....E.....K.TEQ..D...E.K.....
RMiGA_AII   ..N..NH.L...I.....E.....K.TEQV..D...E.K.....
RMiGA_BI    ...EH.LE...I.....E.....K.TEQ..D...E.K.....
RMiGA_BII   ..EH.QL...I.....E.....K.TEQ..D...E.K.....
RMiGA_CI    ...NH.LE...I.....E.....K.TEQ..D...E.K.....
RMiGA_CII   ..K.EH.LE...I.....E.....K.TEQ..D...E.K.....
RMiGA_DI    ..N..NH.L...I.....E.....K.TEQV..D...E.K.....
RMiGA_DII   ..K.EH.LE...I.....E.....K.TEQ..D...E.K.....
RMiGA_RJZ7  ..NH.L...I.....E.....K.TEQ..D...E.K.....
RMiGA_RUA8  ...NH.LE...I.....E.....K.TEQ..D...E.K.....
AGMiGA     ...NH.LE.Q...IT.....E.....K.TEQ..D...E.K...P.....

```

```

                    350
HuIgA1      AEDWKKGDTFSCMVGHEALPLAFTQKTIDRLAGKPTHVNVSVVMAEVDGTCY
HuIgA2      .....
RMiGA_AI    .....
RMiGA_AII   .....
RMiGA_BI    .....
RMiGA_BII   .....
RMiGA_CI    .....
RMiGA_CII   .....
RMiGA_DI    .....
RMiGA_DII   .....
RMiGA_RJZ7  .....
RMiGA_RUA8  .....
AGMiGA     .....

```

**c**

```

                                     50                                     100
                                     |                                     |
HuIgD  APTKAPDVFPIISGCRHPKDNSPVVLAACLITGYHPTSVTVTWYMGTSQPQRTFPEIQRRDSYYMTSSQLS--TPLQQWRQGEYKCVVQHTASKSKKE-I
RhIgD  -----A.....A.QL.....N.K.....HL...I.N.IM...TE.EG.-.T....APTP..S.QH.....T.K..P.DTS..KT
AGMIgD  .S.....-T.A.EL.....N.K.....HL...I.N.IM...TDTQG.-.T....V-TP..S.RH.....T.K..P.NTN..KT

                                     150                                     200
                                     |                                     |
HuIgD  FRWPESPKAQASSVPTAQPOAEGSLAKATTAPATTRNTGRGGEKKKEKEEQEERETKTPECPHSHTQPLGVYLLTPAVQDLWLRDKATFTCFVVGSDL
RhIgD  .....YP...V.....G.S...RP...N.....--RE.EDE.EK..Q.G.....P..L...FQ..V.....
AGMIgD  .H.....YP..S.....G.S...RS...N.....--RE.ED..EK..Q.G.....R.....I...P..L...F.....

                                     250                                     300
                                     |                                     |
HuIgD  KDAHLTWEVAGKVPVTGGVEEGLLERHSNGSQSQRSLTLPRSLWNAGTSVCTLNHPSLPPQRLMALREPAQAQPVKLSLNLLASSDPPEAASWLLCEVS
RhIgD  Q...S.....K..M...P..Q.....A.....S.K.....R.....
AGMIgD  Q...S.....K.DM...P..Q.....A.....S.K.....R.....

                                     250
                                     |
HuIgD  GFSPFNILLMWLEDQREVENTSGFAPARPPPQPRSTTFWAWSVLRVPAPPSQPATYTCVVSHEDSRTLLNASRSLEVSIVTDHGPMK
RhIgD  D.....N.....W..TTH.T...G..M.....G.T.....
AGMIgD  D.....S.W..TTH.T...G..M.....G.T.....V.YLTD RGP.KX-----
```

**d**

```

                                     50                                     100
                                     |                                     |
HuIgM  GSASAPTLFPLVSCENSPTSSTSSVAVGCLAQDFLPSITLSWKYKNSDIS--TRGFPSVLRGGKYAATSQVLLPSKDVMOGTDEHVVCVKVQHPNGNKEK
RhIgM  .....A.L..NE.....F..F...N..KGVW.....A.....Q
AGMIgM  .....ALL..NK.....F..F...KGVW.....D..V.....A.T.....Q

                                     150                                     200
                                     |                                     |
HuIgM  NVPLPVIAELPPKVSFVPPRDGFFGNPRKSKLICQATGFSPRQIQVSWLREGKQVSGVTTDQVQAEAKESGPTTYKVTSTLTIKESDWLGQSMFTCRV
RhIgM  .....L..R..N.....V...E.....E.....I...R.E.....F.....VS.R...S..V....
AGMIgM  .....V..Q..N...I...V...E.....E.....I...E.....F.....VS.R...S..V....

                                     250                                     300
                                     |                                     |
HuIgM  DHRGLTFQQNASSMCPDQDTAIRVFAIPPSFASIFLTKSTKLTCLVTDLTTYSVTISWTRQNGEAVKTHTNISESHPNATFSAVGEASICEDDWNNGE
RhIgM  .....K.V..V.G.NP.....A.....T.....L.....G.....
AGMIgM  .....K.V..V.G.NP.I.....A.....L.....G.....

                                     350                                     400
                                     |                                     |
HuIgM  RFTCTVTHDPLSPLKQTIISRPKGVALHRPDVYLLPPAREQLNLRRESATITCLVTGFSPADVFVQWMQRGQPLSPEKYVTSAPMPEPQAPGRYFAHSILT
RhIgM  ..R.....M.....I.....I.....
AGMIgM  W.R.....PM.....I.....

                                     430
                                     |
HuIgM  VSEEEWNTGETYTC-VAHEALPNRVTERTVDKST
RhIgM  ....D.....V.....
AGMIgM  ....D.....V.....
```

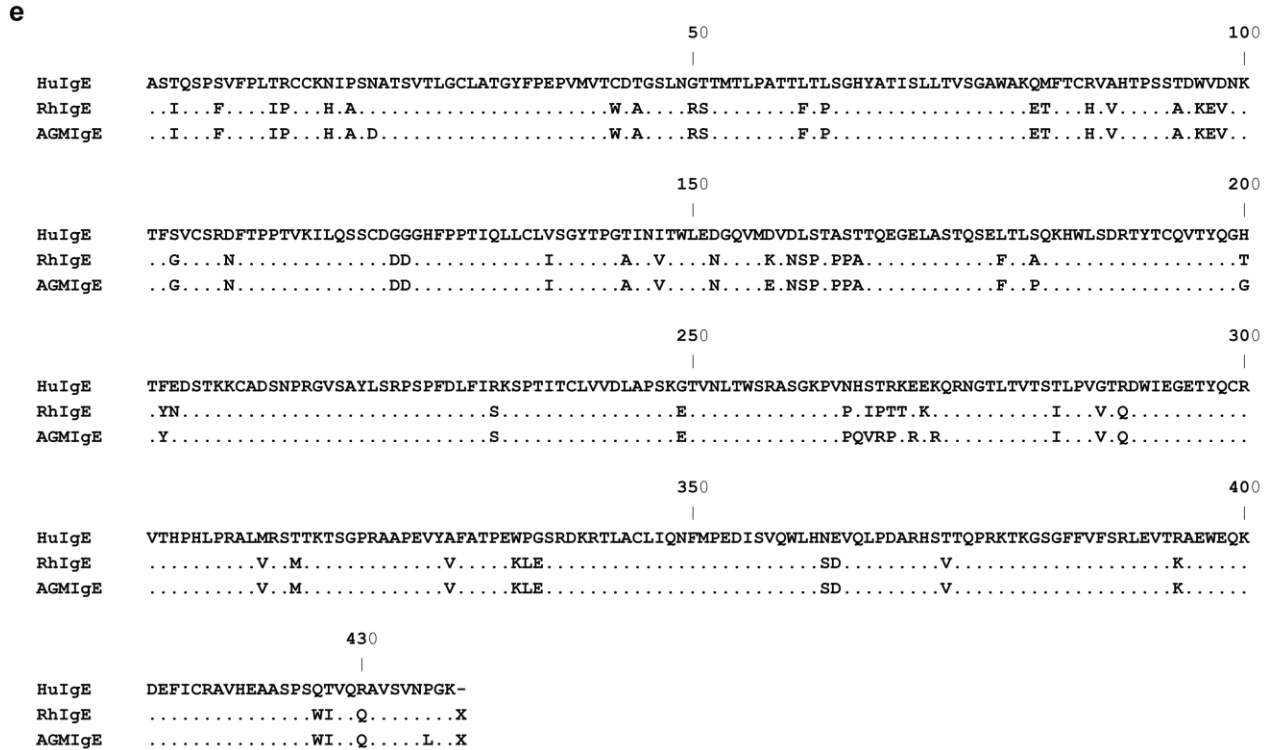

**Supplementary Figure 2 Sequence alignment of AGM, RM, and human Ig constant regions.** Panel **a** shows sequence alignment of IgGs from the three species. The underlined text shows the hinge region of IgGs of three species. Sequences highlighted in yellow represent the identical residues in the hinge region between AGM IgG1 and RM IgG1. Sequences in red show the shared unique mutations in the C<sub>H</sub>3 domain of AGM IgG2 and RM IgG2. Panel **b** shows sequence alignment of IgAs of three species. The hinge region of human IgA1 is highlighted in red. Ten RM intra-species heterogenous IgA alleles were used in the alignment. The sequence alignments of IgD (**c**), IgM (**d**) and IgE (**e**) of three species are also represented.

|               |                                                                                                                                       |     |          |               |
|---------------|---------------------------------------------------------------------------------------------------------------------------------------|-----|----------|---------------|
|               |                                                                                                                                       | 50  |          | 100           |
|               |                                                                                                                                       |     | μE1      | μE5           |
| AGM_IgH_Eμ    | CATCATAAATCAAGTTTATTTTTTTAATTAATTCAGTCAACCTGGGACGGGATGATGAGTTAGAGTCAAGATGGCTGGCATGGGGTCTTTGGCAACCA                                    |     |          |               |
| Rhesus_IgH_Eμ | .....G.....C.....G                                                                                                                    |     |          |               |
| Human_IgH_Eμ  | .....C.....A..A.....A.....CC.....                                                                                                     |     |          |               |
|               |                                                                                                                                       | 150 |          | 200           |
|               | μE2                                                                                                                                   | μA  | μE3      | μB            |
| AGM_IgH_Eμ    | <u>GCAGGTGGCAGGAAGCA</u> <u>GGTCA</u> <u>CCGGCAAGAGTCTA</u> <u>TTTTAGGA</u> GCAAAAAACAACAACCTGGTACATTTATCATTCTCGTTGIGAAAGAGGIGGTTTCGC |     |          |               |
| Rhesus_IgH_Eμ | .....G.....T.....-.....C...G.T...A...G.....                                                                                           |     |          |               |
| Human_IgH_Eμ  | .....G.....T...A.....T..                                                                                                              |     |          |               |
|               |                                                                                                                                       |     | μE4      | Octamer motif |
| AGM_IgH_Eμ    | CTGGGOCAGATCTGAAGTGTCTCTACAGCAAAACA <u>CACC</u> <u>GGCA</u> <u>CGATTTGGGT</u> TTCTAAATAAGGCGAGGCTGACCGAAACIGGAAAGGCTC-TT              |     |          |               |
| Rhesus_IgH_Eμ | .....C.....A.....A.....T..                                                                                                            |     |          |               |
| Human_IgH_Eμ  | .CA.....A.....A.....---                                                                                                               |     |          |               |
|               |                                                                                                                                       | 350 |          |               |
|               |                                                                                                                                       |     | CACA Box | TATA Box      |
| AGM_IgH_Eμ    | TTTTTTAACTATCCGATTTTCATTT <u>CCAAT</u> CTAGCTTATCAACCTAGTCTGTTGTCAAACAGG <u>ATA</u> TCAACTTCTAAACTGCATTTCATTTT                        |     |          |               |
| Rhesus_IgH_Eμ | .....A.....C.....C.....                                                                                                               |     |          |               |
| Human_IgH_Eμ  | .....T.....C.....                                                                                                                     |     |          |               |

**Supplementary Figure 3 Comparison of IgH intronic enhancer core region (cEμ) of AGM, RM and human.** The cEμ elements, Octamer motif, CACA box, and TATA box were highlighted and underlined. RM cEμ intronic enhancer region was identified from the assembly on Oct. 2010 (BGI CR\_1.0/rheMac3).

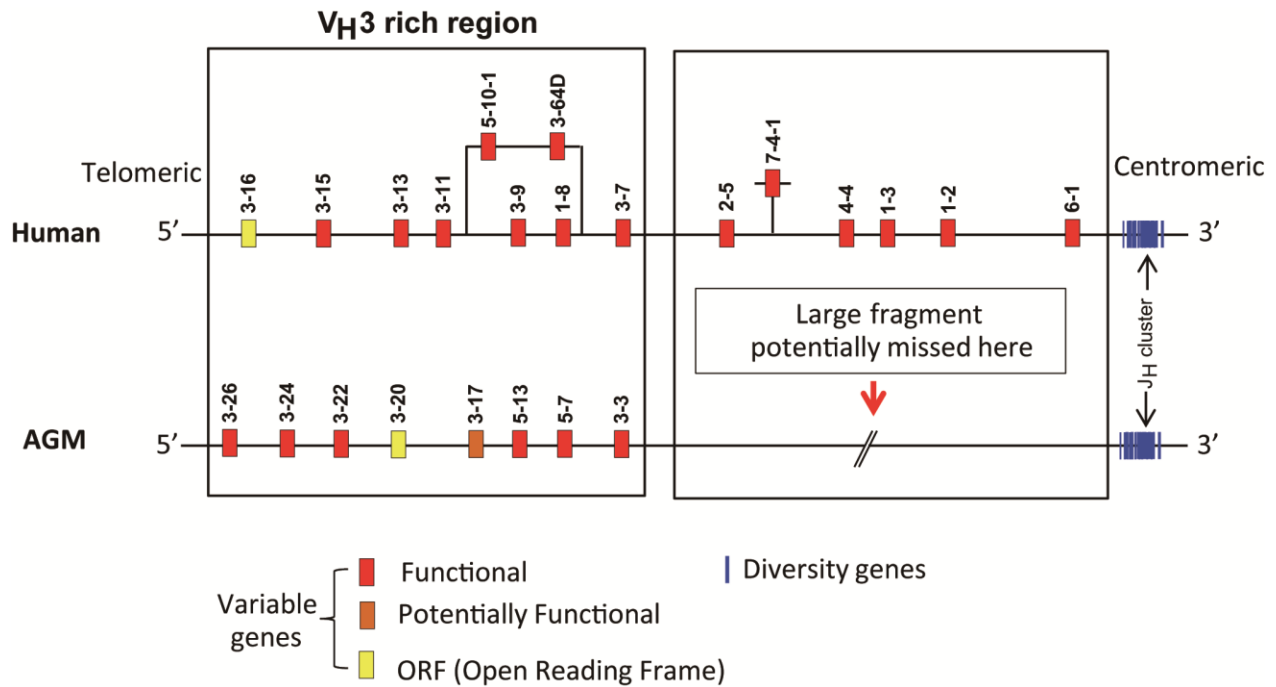

**Supplementary Figure 4 Comparison of the centromeric region of V<sub>H</sub> locus in AGM and human genomes.** Mapping of AGM V<sub>H</sub> gene segments in reference of human genome indicated that a large DNA fragment is potentially missing in the centromeric side of AGM V<sub>H</sub> locus, in which V<sub>H</sub>6, V<sub>H</sub>7 and V<sub>H</sub>2 might be located by comparing human V<sub>H</sub> locus.



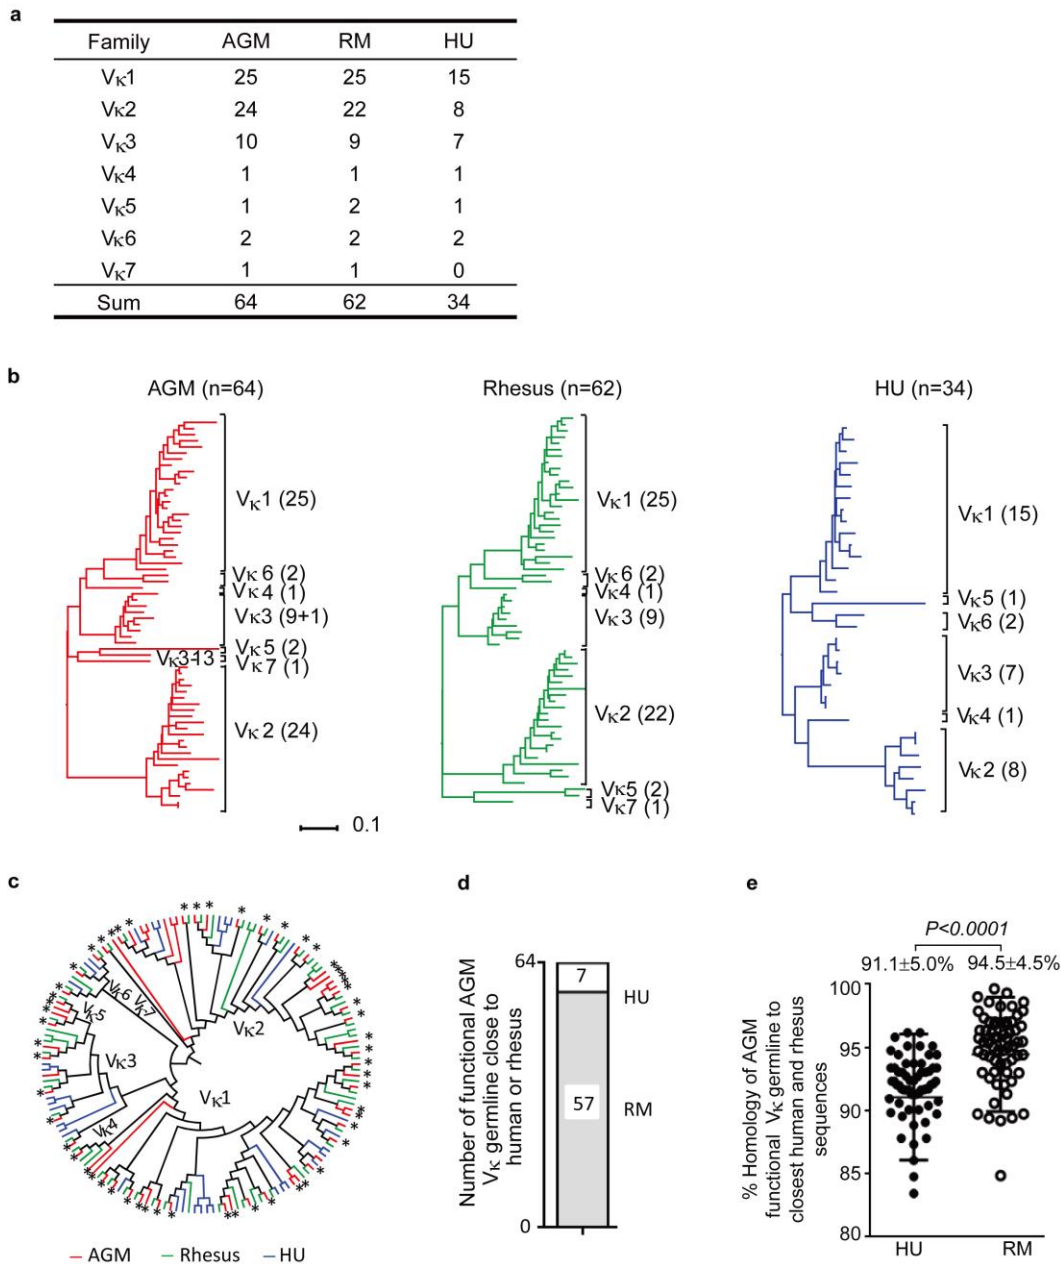

**Supplementary Figure 5 AGM, RM and human immunoglobulin kappa chain variable gene (V<sub>κ</sub>) homology.** AGM V<sub>κ</sub> genes are genetically more similar to those of RM than human. **Panel a** shows numbers of functional V<sub>κ</sub> genes from each species. **Panel b** shows phylogenetic comparison of V<sub>κ</sub> families of AGM, RM and human. AGM V<sub>κ</sub> 3-13 is located out of V<sub>κ</sub> 3 family branch and has a human homologue gene as IGKV3-NL5\*01 F. **Panel c** shows joint radial phylogenetic tree of AGM (red lines), RM (green lines), and human (blue lines) V<sub>κ</sub> genes; the AGM V<sub>κ</sub> genes that are genetically more similar to RM than human V<sub>κ</sub> homologs are indicated with star (\*). **Panel d** indicates the number of AGM V<sub>κ</sub> genes that are genetically more similar to RM (grey box) or human (white box) than AGM. **Panel e** indicates percent homology of AGM V<sub>κ</sub> genes to those of RM and human. Percent homology between V<sub>κ</sub> germline genes between AGMs, humans and RMs were compared ( $p < 0.0001$ ) using an Exact Wilcoxon rank sum test. The data in Panel e shows means $\pm$ sd.



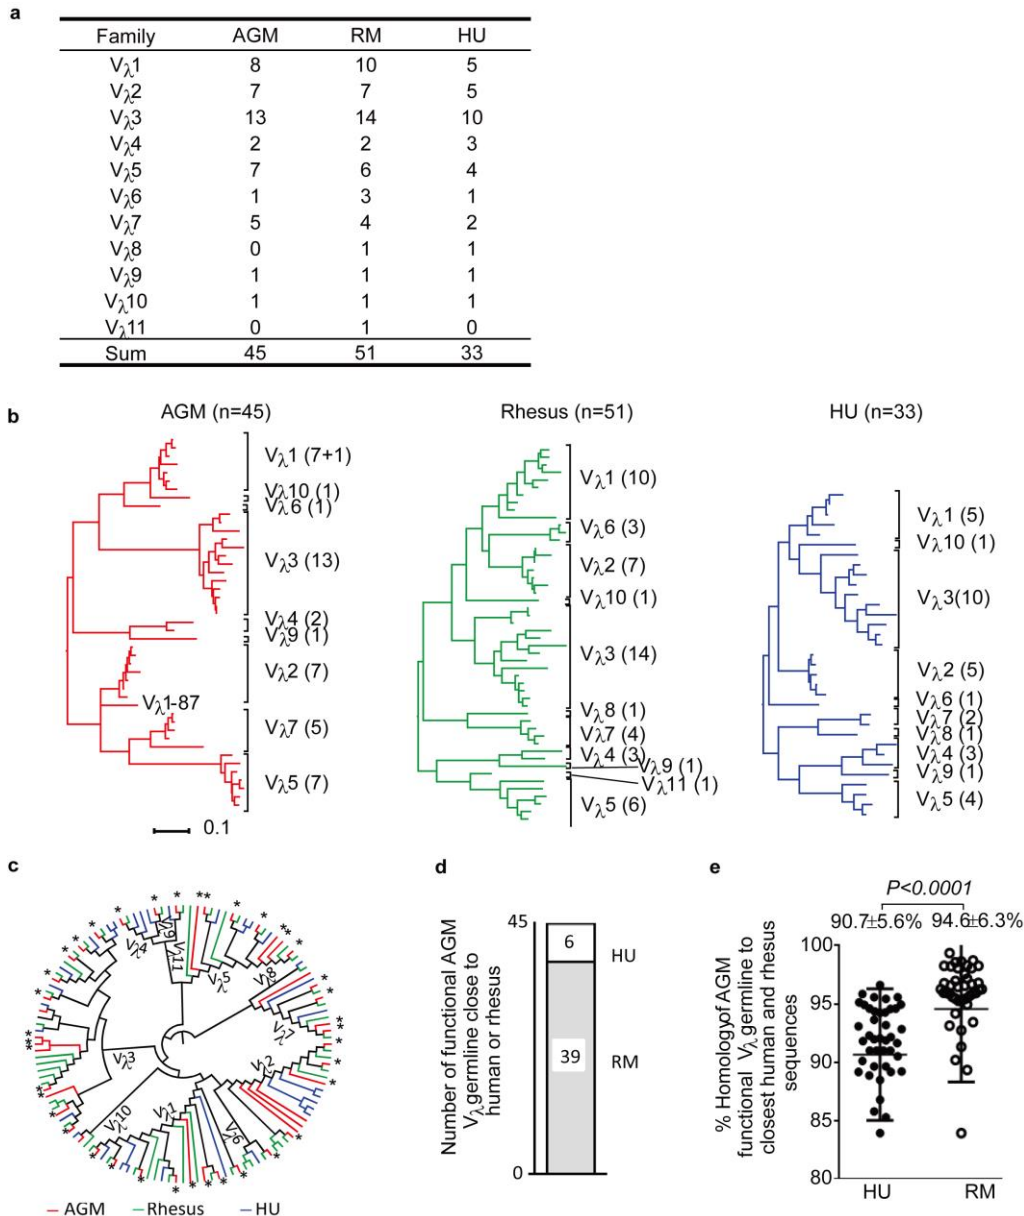

**Supplementary Figure 6 AGM, RM and human immunoglobulin lambda chain variable gene (V<sub>λ</sub>) homology.** AGM V<sub>λ</sub> genes are genetically more similar to those of RM than human. **Panel a** shows number of functional V<sub>λ</sub> genes in each species. **Panel b** shows phylogenetic comparison of AGM, RM and human V<sub>λ</sub> families. AGMLV1-87 is located out of V<sub>λ</sub>1 family branch, and has the human homologue gene as IGLV1-62\*01 P. **Panel c** shows joint radial phylogenetic tree of AGM (red lines), RM (green lines), and human (blue lines) V<sub>L</sub> genes; the AGM V<sub>λ</sub> genes that are genetically more similar to RM than human V<sub>λ</sub> homologs are indicated with star (\*). **Panel d** shows number of AGM V<sub>λ</sub> genes genetically more similar to RM (grey box) or human (white box) than AGM. **Panel e** shows percent homology of AGM V<sub>λ</sub> genes to those of RM and human. Percent homology between V<sub>λ</sub> germline genes between AGMs, humans and RMs were compared ( $p < 0.0001$ ) using an Exact Wilcoxon rank sum test. The data in Panel e shows means ± sd.

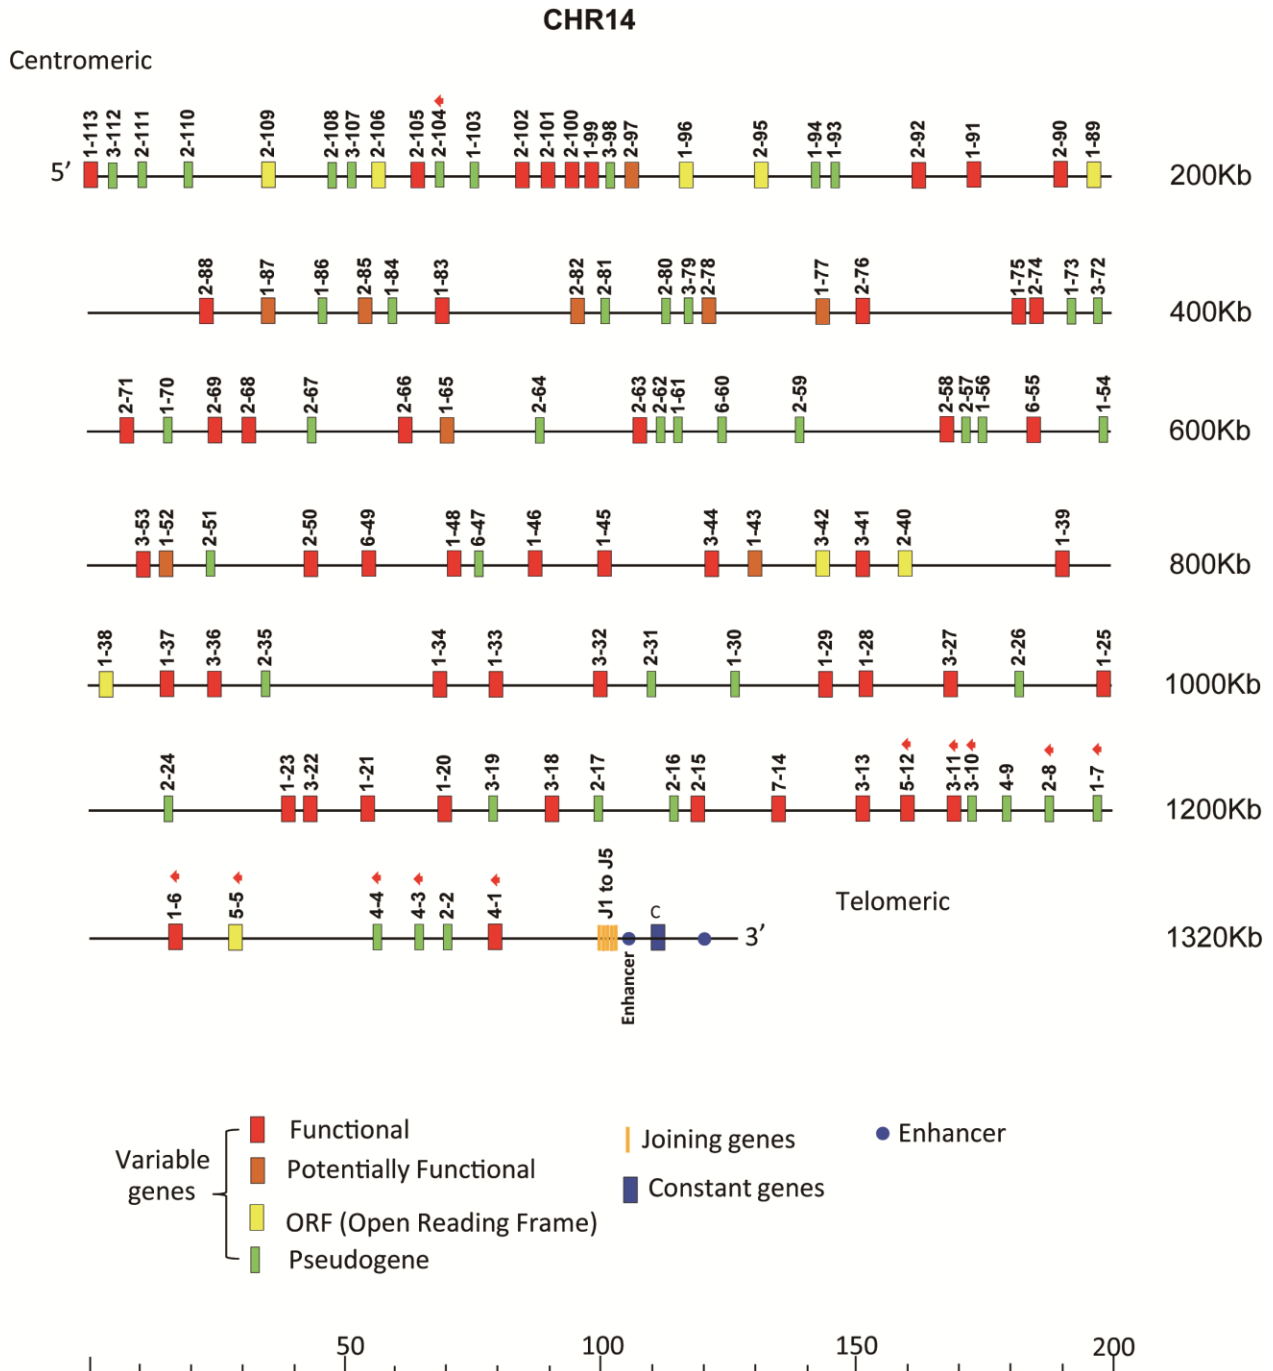

**Supplementary Figure 7 Map of AGM (*Chlorocebus sabaues*) immunoglobulin  $\kappa$  locus on chromosome (CHR) 14.** Shown are the identified functional, potentially functional, open reading frames, and pseudogenes of AGM  $V_{\kappa}$  and  $J_{\kappa}$  germline segments along with the Ig kappa chain constant region gene located on CHR14.

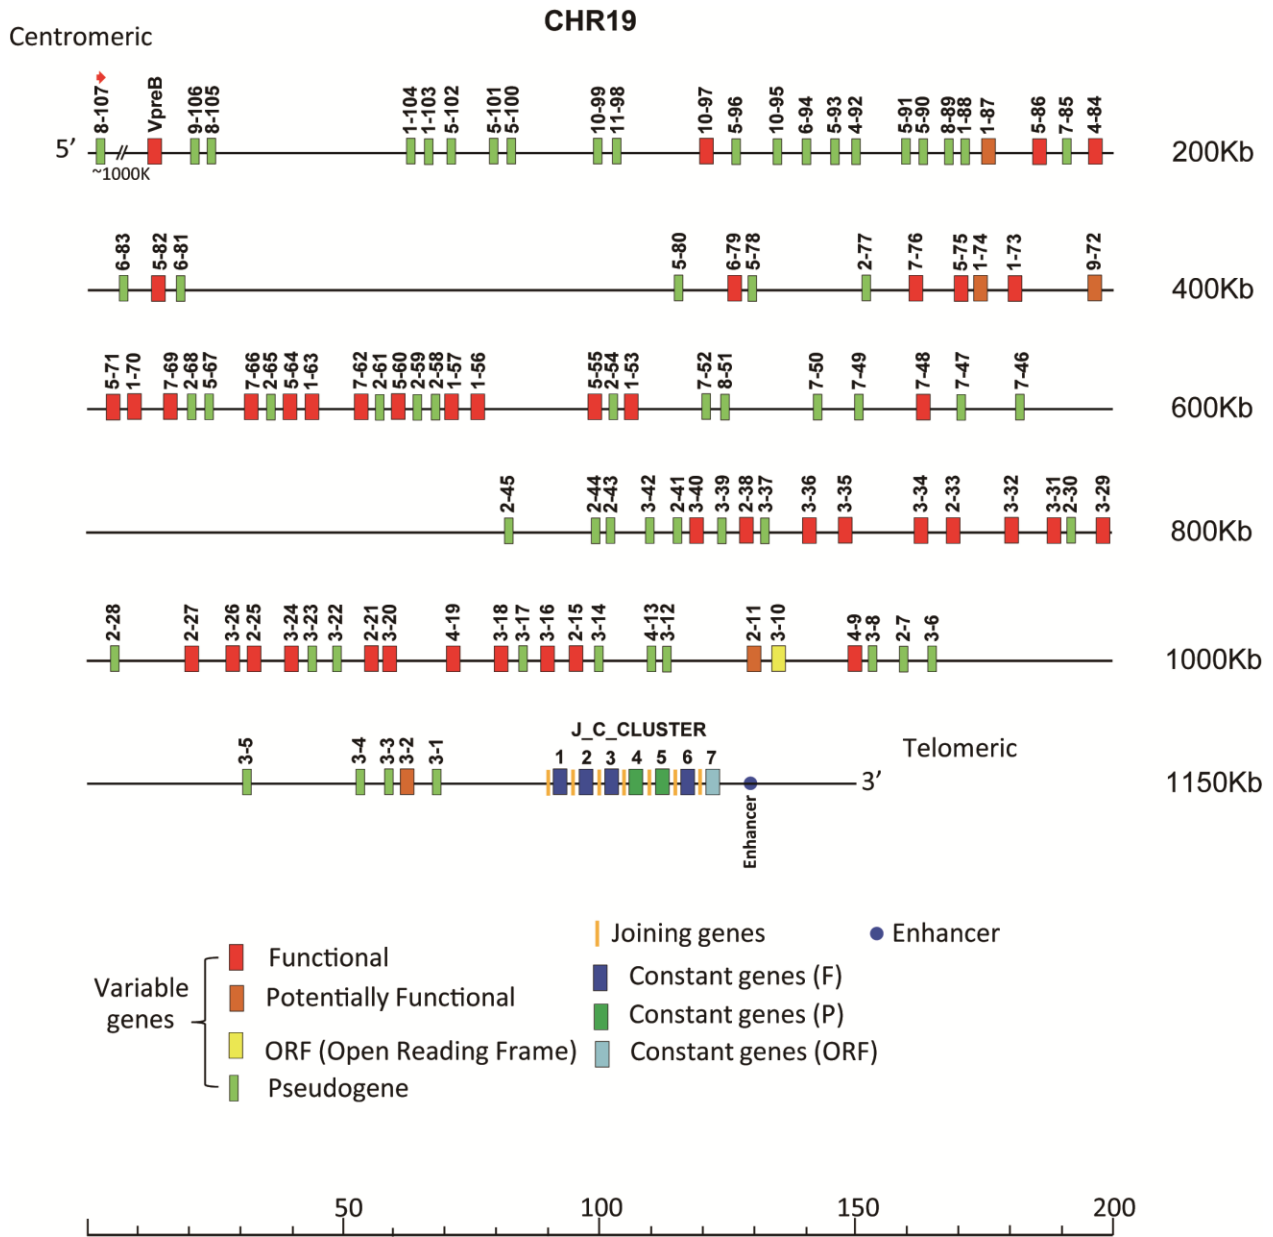

**Supplementary Figure 8 Map of AGM (*Chlorocebus sabaeus*) immunoglobulin  $\lambda$  locus on chromosome (CHR) 19.** Shown are the identified functional, potentially functional, open reading frames, and pseudogenes of AGM  $V_\lambda$  and  $J_\lambda$  germline segments along with the Ig lambda chain constant region gene located on CHR19.

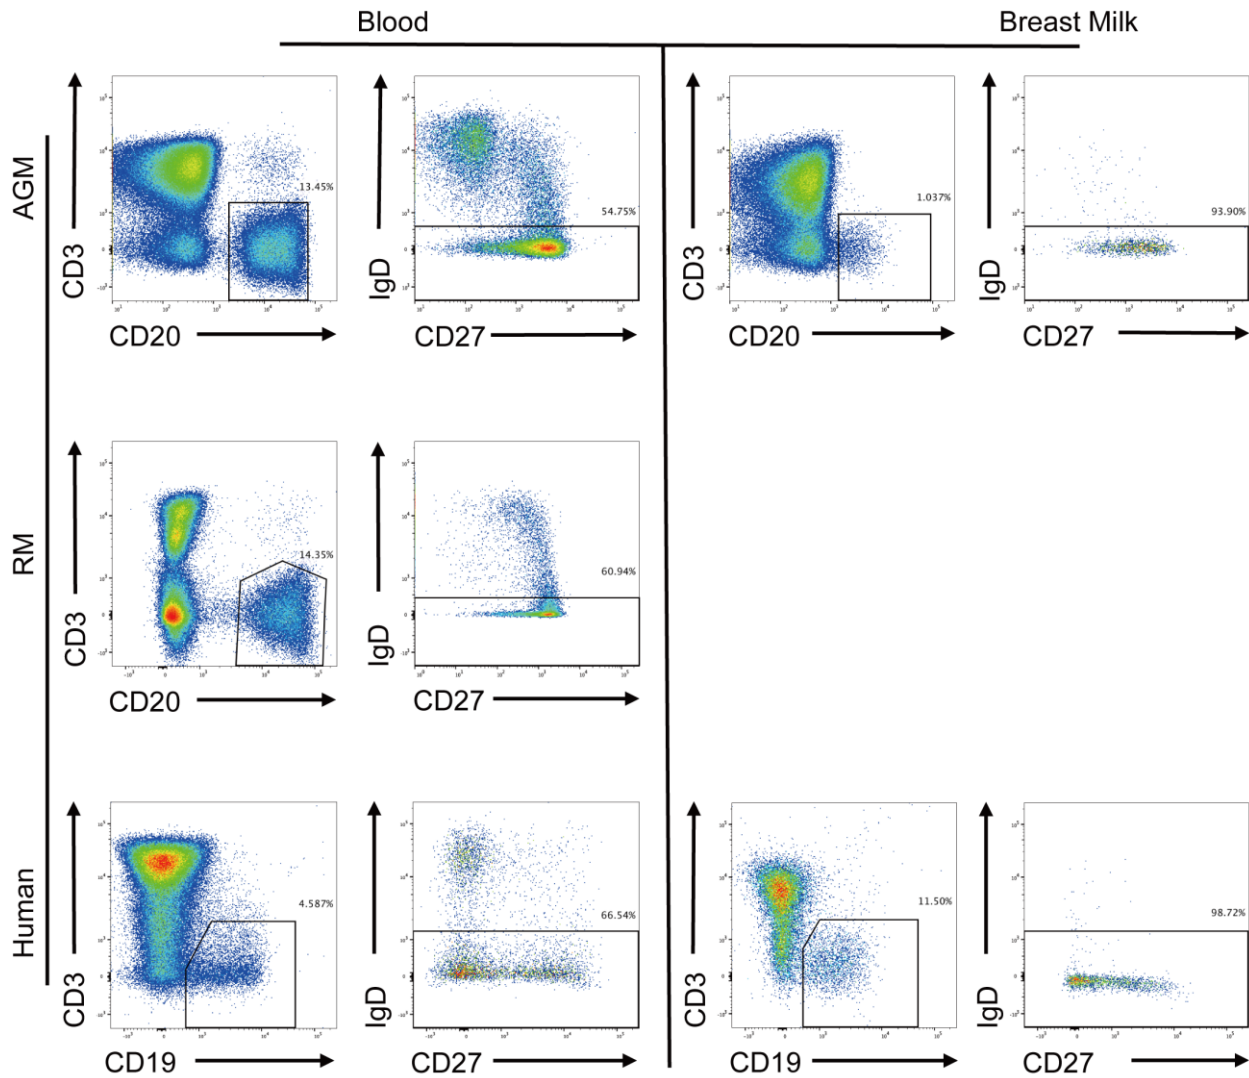

**Supplementary Figure 9 Gating strategy for total memory B cell populations in blood and milk of SIV/HIV-infected, AGM, RM, and human.** Total memory B cells of SIV-infected AGM and RM were gated as CD3<sup>-</sup>/CD20<sup>+</sup>/IgD<sup>-</sup> (top two rows). Total memory B cells from blood and milk of HIV-infected human were gated as CD3<sup>-</sup>/CD19<sup>+</sup>/IgD<sup>-</sup> (bottom row).

a

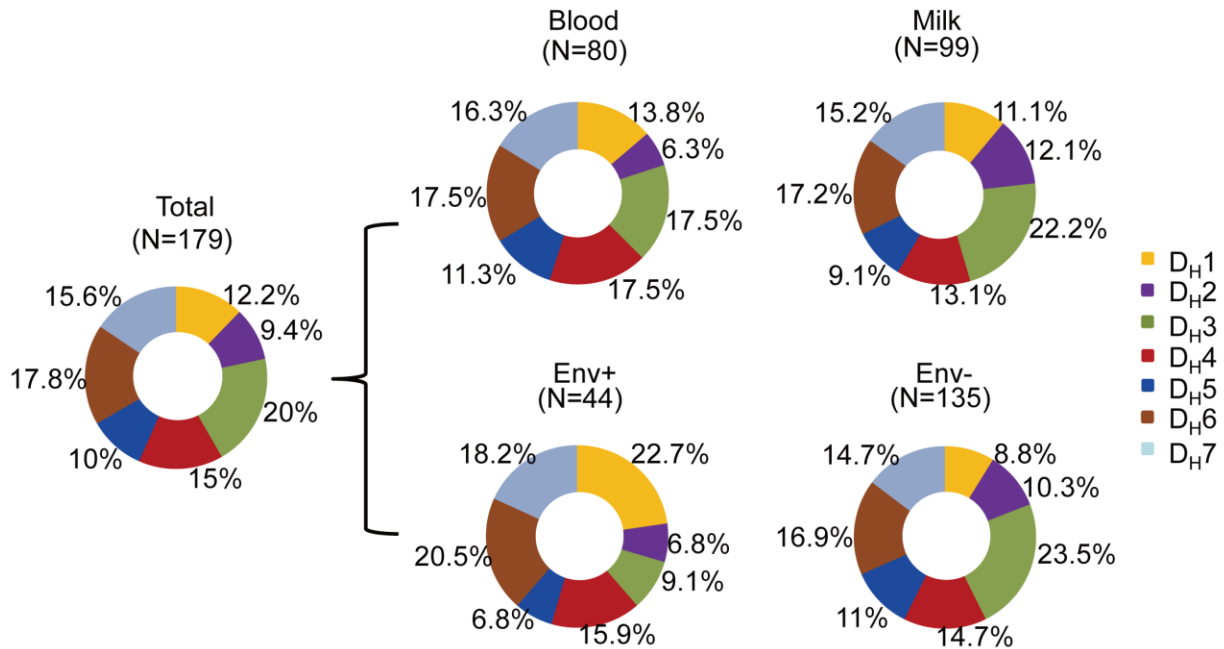

b

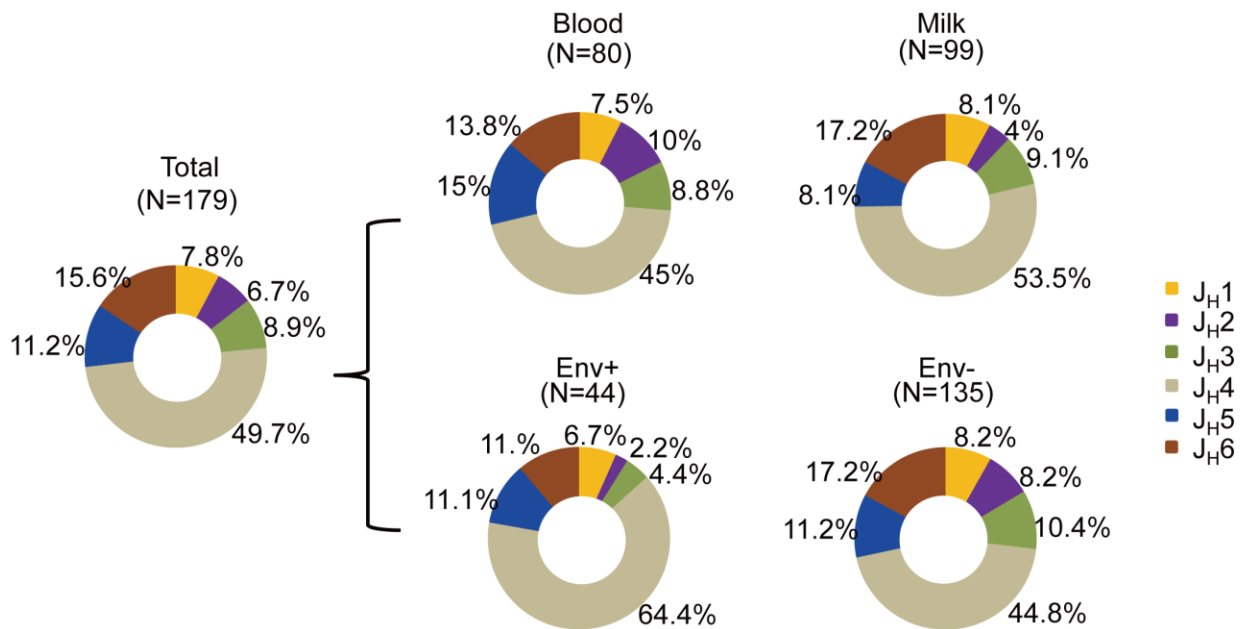

**Supplementary Figure 10 Genetic distribution of D<sub>H</sub> and J<sub>H</sub> of AGM Env-specific and non Env-specific mAbs.** The distribution of D<sub>H</sub> gene families (Panel a) and J<sub>H</sub> gene families (Panel b) isolated from AGM blood and milk samples.

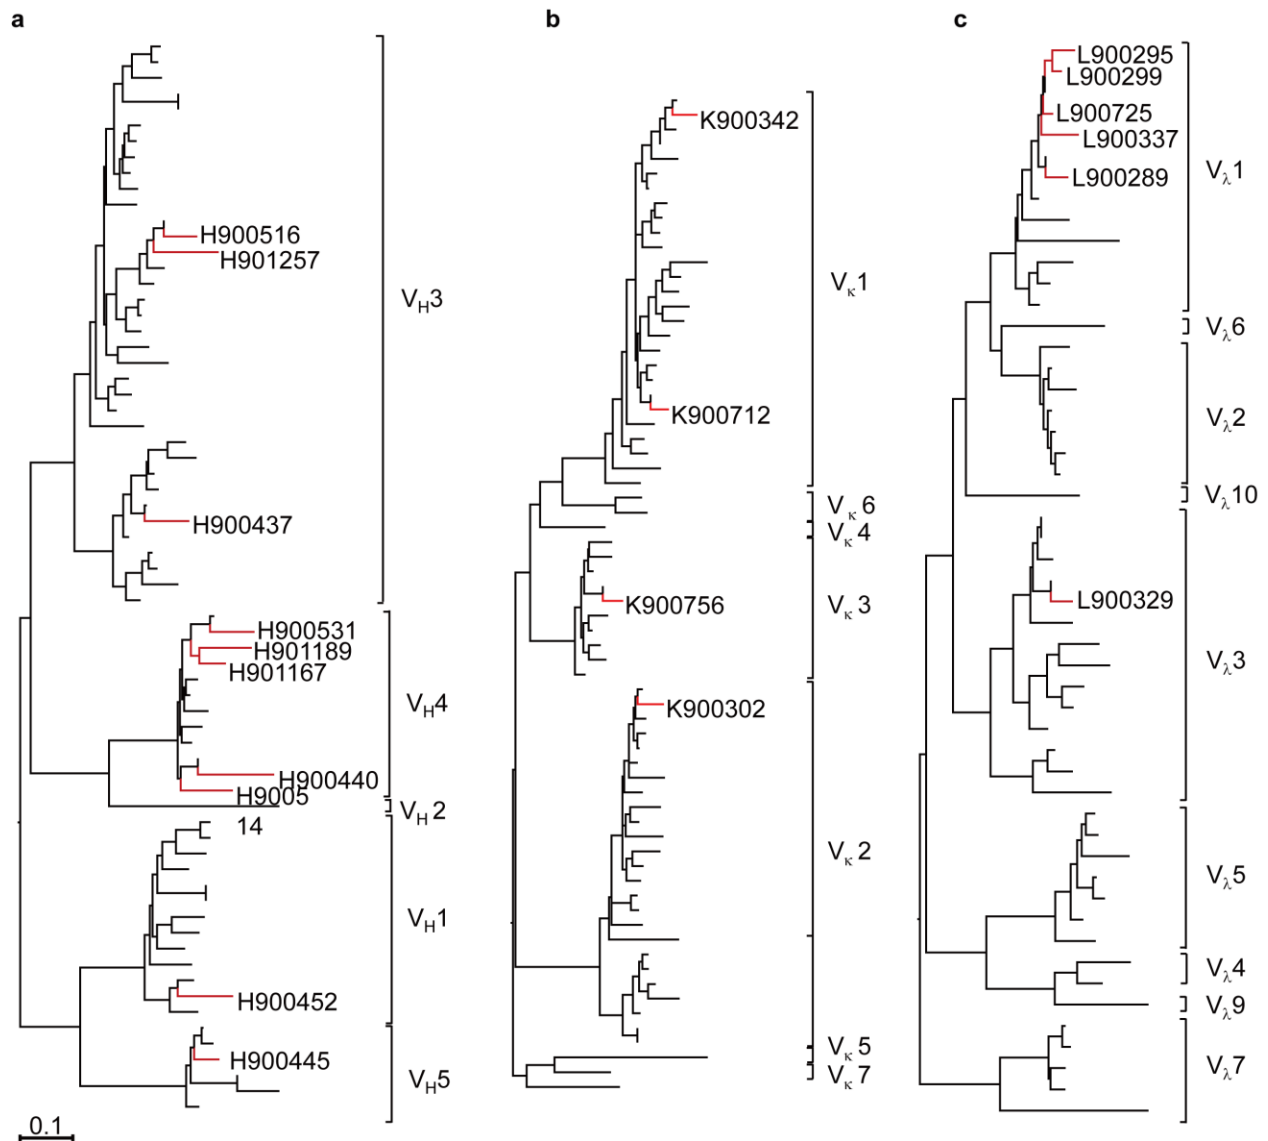

**Supplementary Figure 11 The phylogenetic relationship of 10 purified SIV Env-reactive mAbs to AGM heavy and light chain variable germline genes.** The phylogenetic relationship of V<sub>H</sub> (Panel a), V<sub>κ</sub> (Panel b) and V<sub>λ</sub> (Panel c) genes of 10 purified SIV Env-reactive mAbs to AGM V<sub>H</sub> germline genes.

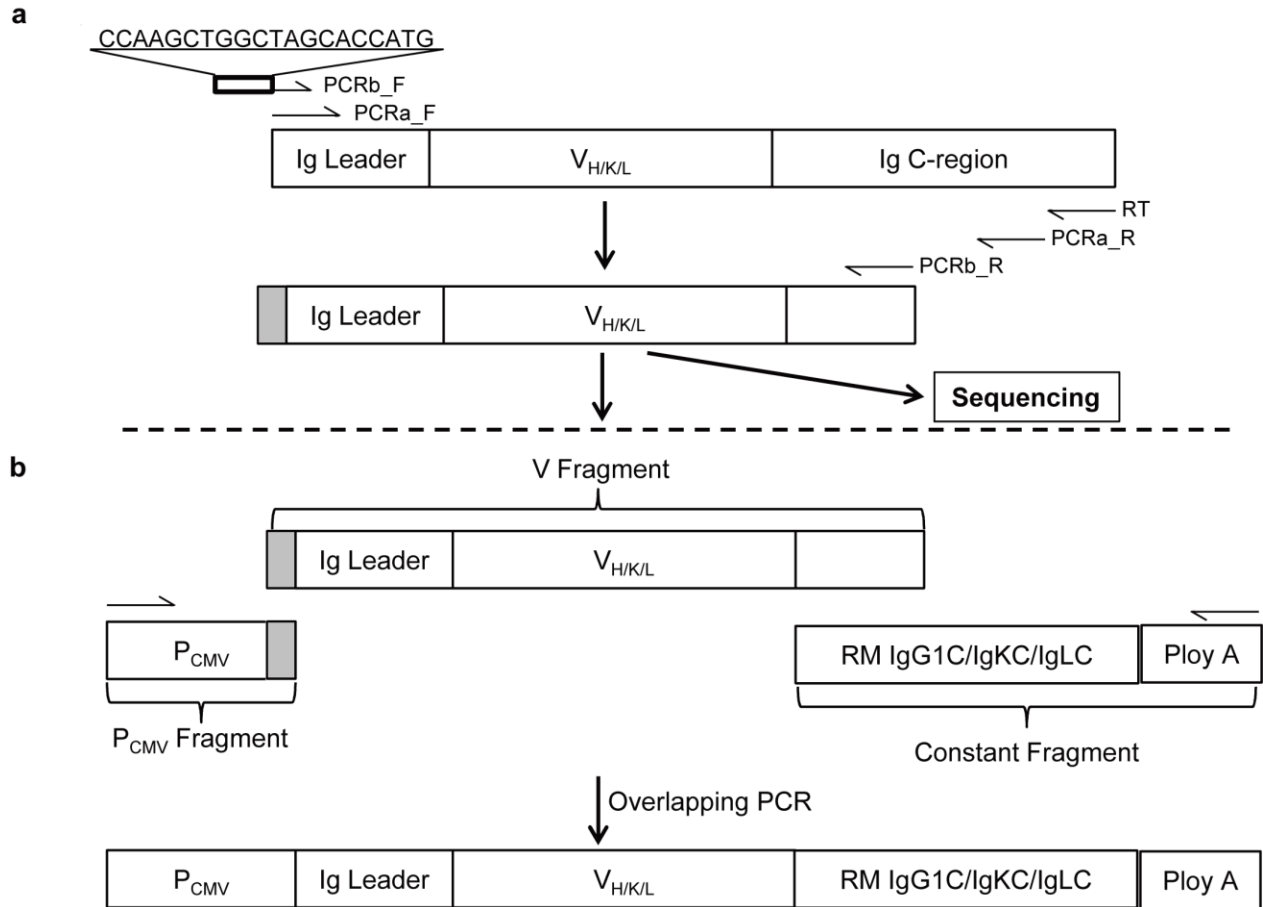

**Supplementary Figure 12 Schematic diagram for the generation of linear full-length Ig heavy- and light-chain gene constructs. (a)** Schematic representation of cloning rhesus immunoglobulin heavy and light chain variable genes by semi-nest PCR. **(b)** The Ig H/L PCR products were sequenced and the functional genes were then assembled into full-length linear expression cassettes with CMV promoter and BGH Poly A by overlapping PCR.



**Supplementary Table 1 Demographic, virologic, and immunologic characterization of HIV-1-infected individuals used for antibody isolation from blood and breast milk**

| #                   | Patient ID   | Number of Antibodies Isolated |      |       | Patient Characteristics |     |                   |                    |                            |                                    |     |
|---------------------|--------------|-------------------------------|------|-------|-------------------------|-----|-------------------|--------------------|----------------------------|------------------------------------|-----|
|                     |              | Blood                         | Milk | Total | Age (yrs)               | Sex | Country of Origin | Specimen Draw Date | Viral Load (RNA copies/mL) | CD4 count (cells/mm <sup>1</sup> ) | ARV |
| 1                   | 711-12-071-8 | 93                            | 0    | 93    | 21                      | M   | USA               | 24-Jun-10          | <40                        | 528                                | Yes |
| 2                   | 700-12-051-1 | 68                            | 0    | 68    | 59                      | M   | USA               | 9-Oct-09           | 16,800                     | 957                                | No  |
| 3                   | 714-90-060-8 | 22                            | 0    | 22    | 41                      | F   | Malawi            | 3-Dec-07           | <400                       | 275                                | Yes |
| 4                   | 715-90-060-5 | 0                             | 3    | 3     | 28                      | F   | Malawi            | 2-Apr-08           | 32,164                     | 519                                | No  |
| 5                   | 714-09-360-1 | 0                             | 31   | 31    | 18                      | F   | Malawi            | 10-Mar-08          | 60,335                     | 452                                | No  |
| 6                   | 715-90-030-1 | 6                             | 5    | 11    | 32                      | F   | Malawi            | 26-Mar-08          | 75,934                     | 406                                | No  |
| 7                   | 715-90-120-9 | 14                            | 2    | 16    | 25                      | F   | Malawi            | 18-Jun-08          | 174,976                    | 153                                | No  |
| Antibodies Isolated |              | Blood                         |      | 203   |                         |     |                   |                    |                            |                                    |     |
|                     |              | Milk                          |      | 41    |                         |     |                   |                    |                            |                                    |     |
|                     |              | Total                         |      | 244   |                         |     |                   |                    |                            |                                    |     |

<sup>1</sup> VL and CD4 count performed at the time of PBMC/milk cell isolation

**Supplementary Table 2 Amino acid sequences of the upper, core and lower hinge of IGG molecules from AGM (*Chlorocebus Sabaeus*), RM, and human.**

|          | Upper Hinge   | Core            | Lower Hinge         |
|----------|---------------|-----------------|---------------------|
| HU_IgG1  | EPKSCDKTHT    | CPPC            | PAPELLGGP           |
| RM_IgG1  | EIKTCGGGSKPPT | CPPC            | PAPELLGGP           |
| AGM_IgG1 | EIKTCGGGGKPPT | CPPC            | PAPELLGGP           |
| HU_IgG2  | ERK           | CCVECPCP        | PAPPVAGP            |
| RM_IgG2  | GLP           | CRSTCPPC        | PAELLGGP            |
| AGM_IgG2 | not available | not available   | ELLGGP<br>(partial) |
|          |               | CPRCP           |                     |
| HU_IgG3  | ELKTPLGDTTHT  | EPKSCDTPPPCPRCP | APELLGGP            |
|          |               | EPKSCDTPPPCPRCP |                     |
|          |               | EPKSCDTPPPCPRCP |                     |
| RM_IgG3  | EFTPPCST      | CPPC            | PAPELLGGP           |
| HU_IgG4  | ESKYGPP       | CPSC            | PAPEFLGGP           |
| RM_IgG4  | EFTPP         | CPPC            | PAPELLGGP           |

**Supplementary Table 3 Primer list for amplifying both AGM and rhesus macaque Ig pairs**

| Primers      | Sequences                       | Tm   |
|--------------|---------------------------------|------|
| RT primers   |                                 |      |
| G_RT         | TCTGTGCCACCTTGGTGTTG            | 51.8 |
| M-RT         | TGAATTTCCAGGAGAAAGTGATG         | 51.7 |
| A_RT         | TGTTTCCRGATTTTGAGATGGTG         | 53.5 |
| D_RT         | AAGGTCTTCTCCTTGCTTGTATC         | 53.5 |
| E_RT         | TTGGAATCTGCACACTTCTTG           | 50.5 |
| CK_RT        | TCTCTGGGATAGAAGTTATTCAG         | 51.7 |
| CL_RT        | CTTGTTGTTGCTCTGTTTGGAG          | 53   |
| PCR1 primers |                                 |      |
| IgH primers  |                                 |      |
| VH1+7_EXT1   | CACCATGGACTGGACCTGGAGGMTCCCTC   | 67.9 |
| VH1+7_EXT2   | CACCATGGACCTGACCCGGAGGATCCTTTTC | 72.4 |
| VH2_EXT      | CACCATGGACACGCTTTGCTCCACRCTC    | 68   |
| VH3_EXT1     | CATGGAGTTgGGGCTGAGCTGGGTYTTCC   | 71.3 |
| VH3_EXT2     | CATGGAGTTgGGGCTGAGYTGGGTTTTCC   | 69.7 |
| VH3_EXT3     | CATGGAGTTTGGGCTGAGCTGGR         | 61.1 |
| VH3_EXT4     | CATGGAGTTTGGGCTGAGCTKGGTTTTYC   | 66.8 |
| VH4_EXT1     | ACCATGAAGCACCTGTGGTTCTBCCTCCTCC | 69.7 |
| VH4_EXT2     | CACCATGAAGCACCTGKGGTTCTTY       | 60.1 |
| VH5_EXT      | CACCATGGGGTCAACTGCCMTCCTC       | 65.3 |
| VH6_EXT      | CCATGTCTGTCTCCTTCCTCATCGTCC     | 63.8 |
| A_EXT        | GAAGAAGCCCTGGACCAGGCAGGC        | 66.6 |
| G-EXT        | AAGGTGTGCACGCCGCTGGTCAG         | 66.9 |
| M_EXT        | GTCGGGAAGGAAGTCCTGTGCGAGG       | 66.5 |
| D_EXT        | TCCCCAGGTGCCAGGTGACAGTCAC       | 66.8 |
| E_EXT        | ACGGTCAGCAAGCTGATGGTGGCA        | 66.3 |

| IgK primers |                                  |      |
|-------------|----------------------------------|------|
| VK1_EXT1    | CACCATGGACATGAGGGYCCC            | 58.4 |
| VK1_EXT2    | CACCATGGACATGAGGGTCCCCAGTC       | 66.9 |
| VK1_EXT3    | CACCATGGACATGAGGGTCCCCGGTtAtC    | 70.2 |
| VK1_EXT4    | CACCATGGACATGAGGGTTCYCCGGTCAG    | 69.5 |
| VK1_EXT5    | CACCATGGACATGAGGGTCCCCGGTCAGCTYC | 75.9 |
| VK2_EXT1    | CACCATGAGGCTCCCWGCTCAG           | 60.6 |
| VK2_EXT2    | CACCATGAGGCTCCCTGCTCAGCTYCTGGGGC | 76.8 |
| VK3_EXT1    | CACCATGGAAGCCCCAGCTCRGCTTCTC     | 69.7 |
| VK3_EXT2    | CACCATGGAAGCCCCAGCACAGCTTCTC     | 70.4 |
| VK4_EXT     | CACCATGGTGTACAGACCCAAGWCTTC      | 64.4 |
| VK5_EXT     | CACCATGGGATCCCAGGTTACCTCCTCAG    | 71.4 |
| VK6_EXT1    | CACCATGGTGTCCCCATTGCAACTCCTG     | 69.9 |
| VK6_EXT2    | CACCATGtTGTCtCCATCACAACTCATtG    | 63.2 |
| VK7_EXT     | CACCATGGGGTCTGGGGCTCCTTTCTG      | 72.2 |
| CK_EXT      | ACCTGATCCTCAGATGGCGGGAAGATG      | 66.7 |
| IgL primers |                                  |      |
| VL1_EXT1    | CACCATGGCCTGGTCTCCTCTCSTCCTCAC   | 69.7 |
| VL1_EXT2    | CACCATGGCCTGGTCTCCTCTCCTtCTC     | 67.4 |
| VL2_EXT     | CACCATGGCCTGGGCTCTGSTCCTC        | 67.2 |
| VL3_EXT1    | CACCATGGCCGGGACCCYTCTCCTCCTC     | 73.1 |
| VL3_EXT2    | CACCATGGCCTGGACCCCTGTTCTGCTC     | 71.8 |
| VL3_EXT3    | CACCATGGCCtGGACCCcTCcCCTRCTC     | 73.1 |
| VL4_EXT     | CACCATGGCCTGGACCCACTCCTCCTC      | 72.6 |
| VL5_EXT     | CACCATGGCCTGGACTCYTCTC           | 57.3 |
| VL6_EXT     | CACCATGGCCTGGGCTCCACTCCTCCTC     | 72.7 |
| VL7_EXT     | CACCATGGCCTGGACTCTGCTCCTCCTCC    | 72   |
| VL8_EXT     | CACCATGGCCTGGATGATGCTTCTCCTCG    | 71.6 |
| VL11_EXT    | CACCATGGCCCTGACTCCTCTCCTCCTC     | 69.1 |
| CL_EXT      | TGCCATCTGCCTTCCAGGCCACTT         | 66.3 |
| Primers     | Sequences                        | Tm   |

PCR2 primers

|             |                                                             |      |
|-------------|-------------------------------------------------------------|------|
| IgH primers |                                                             |      |
| VH1+7_INT1  | CCAAGCTGGCTAGCACCATGGACTGGACCTGGAGGMTCTC                    | 80.1 |
| VH1+7_INT2  | CCAAGCTGGCTAGCACCATGGACCTSAcccGGAGSATCCTTTTC                | 78.4 |
| VH2_INT     | CCAAGCTGGCTAGCACCATGGACACGCTTTGCTCCAC                       | 78.9 |
| VH3_INT1    | CCAAGCTGGCTAGCACCATGGAGTTGGGGCTGAGYTG                       | 78.2 |
| VH3_INT2    | CCAAGCTGGCTAGCACCATGGAGTTTGGGGCTGAGCTKG                     | 78.5 |
| VH4_INT     | CCAAGCTGGCTAGCACCATGAAGCACCTGKGGTTC                         | 75.3 |
| VH5_INT     | CCAAGCTGGCTAGCACCATGGGGTCAACTGCCMTCCTC                      | 79   |
| VH6_INT     | CCAAGCTGGCTAGCACCATGTCTGTCTCCTTCTCATCGTC                    | 77.8 |
| A_ACD_Int   | CAGGGCCGCTGTGCTCTCGGAGGTGCTCCTGCCCTCGAGG<br>CTCAGCGGGAAGAC  | 76.3 |
| A_BC_Int    | CAGGGCCGCTGTGCTCTCGGAGGTGCTCCTGCTGCAGAGG<br>YTCAGCGGGAAGAC  | 75.5 |
| G_Int       | CAGGGCCGCTGTGCTCTCGGAGGTGCTCCTGGAG                          | 80.9 |
| M_Int       | CAGGGCCGCTGTGCTCTCGGAGGTGCTCCTACAGGAGACG<br>AGGGGAAAAGGG    | 61.2 |
| D_Int       | CAGGGCCGCTGTGCTCTCGGAGGTGCTCCTCGCTGATATG<br>ATGGGGAACACATCC | 62.1 |
| IgK primers |                                                             |      |
| VK1_INT1    | CCAAGCTGGCTAGCACCATGGACATGAGGGYCCC                          | 76.6 |
| VK1_INT2    | CCAAGCTGGCTAGCACCATGGACATGAGGGTCYCCG                        | 78   |
| VK2_INT1    | CCAAGCTGGCTAGCACCATGAGGCTCCCWGCTC                           | 75.8 |
| VK3_INT1    | CCAAGCTGGCTAGCACCATGGAAGCCCCAGCWC                           | 76.7 |
| VK4_INT     | CCAAGCTGGCTAGCACCATGGTGTACAGACCCAAG                         | 76.4 |
| VK5_INT     | CCAAGCTGGCTAGCACCATGGGATCCCAGGTTACCTCC                      | 80.3 |
| VK6_INT1    | CCAAGCTGGCTAGCACCATGGTGTCCCCATTGCAACTC                      | 79   |
| VK6_INT2    | CCAAGCTGGCTAGCACCATGTTGTCCATCACAACTC                        | 74.9 |
| VK7_INT     | CCAAGCTGGCTAGCACCATGGGGTCCTGGGCTCCTTTCC                     | 81.5 |
| CK_INT      | TGGCGGGAAGATGAAGACAGATGGTG                                  | 66.2 |
| IgL primers |                                                             |      |
| VL1_INT     | CCAAGCTGGCTAGCACCATGGCCTGGTCTCCTCTC                         | 76.7 |
| VL2_INT     | CCAAGCTGGCTAGCACCATGGCCTGGGCTCTGSTCC                        | 79.5 |
| VL3_INT1    | CCAAGCTGGCTAGCACCATGGCCGGGACCCYTC                           | 78.8 |

|                                                    |                                        |      |
|----------------------------------------------------|----------------------------------------|------|
| VL3_INT2                                           | CCAAGCTGGCTAGCACCATGGCCGGACCCCTS       | 77.4 |
| VL4_INT                                            | CCAAGCTGGCTAGCACCATGGCCTGGACCCACTCC    | 80.6 |
| VL5_INT                                            | CCAAGCTGGCTAGCACCATGGCCTGGACTCYTCTC    | 75.4 |
| VL6_INT                                            | CCAAGCTGGCTAGCACCATGGCCTGGGCTCCTC      | 79.4 |
| VL7_INT                                            | CCAAGCTGGCTAGCACCATGGCCTGGACTCTGCTCCTC | 79.5 |
| VL8_INT                                            | CCAAGCTGGCTAGCACCATGGCCTGGATGATGCTTCTC | 78.6 |
| VL11_INT                                           | CCAAGCTGGCTAGCACCATGGCCCTGACTCCTCTCCTC | 78.9 |
| CL_INT                                             | GTCAGTATCAGACACACTAGTGTGG              | 54.4 |
| Sequencing primers                                 |                                        |      |
| VHKLSEQ_F                                          | CCAAGCTGGCTAGCACCATG                   | 54.7 |
| VHSEQ_R                                            | CTGTGCTCTCGGAGGTGCTCC                  | 55.7 |
| VKSEQ_R                                            | GGAAGATGAAGACAGATGGTG                  | 48.4 |
| VLSEQ_R                                            | TGATCAGACACACTAGTGTGG                  | 45.1 |
| Primers for the construction of linear cassettes   |                                        |      |
| Primers for P <sub>CMV</sub> fragment <sup>1</sup> |                                        |      |
| HV13220CMV-P-F262                                  | AGTAATCAATTACGGGGTCATTAGTTCATAG        | 57.9 |
| CMV-P_R                                            | CATGGTGCTAGCCAGCTTGGGTC                | 60.6 |
| Primers for Rh IgG1C fragment <sup>2</sup>         |                                        |      |
| RhIGC_HF                                           | GGAGCACCTCCGAGAGCACAGC                 | 62   |
| BGH-R1235                                          | TCCCAGCATGCCTGCTATTGTC                 | 61.9 |
| Primers for Rh IgKC fragment <sup>3</sup>          |                                        |      |
| RhIGC_KF                                           | CACCATCTGTCTTCATCTTCCCGCCA             | 65.7 |
| BGH-R1235                                          | TCCCAGCATGCCTGCTATTGTC                 | 61.9 |
| Primers for Rh IgLC fragment <sup>4</sup>          |                                        |      |
| RhIGC_LF                                           | CCACACTAGTGTGTCTGATCAGTG               | 51.3 |
| BGH-R1235                                          | TCCCAGCATGCCTGCTATTGTC                 | 61.9 |
| Primers for overlapping PCR                        |                                        |      |
| HV13220CMV-P-F262                                  | AGTAATCAATTACGGGGTCATTAGTTCATAG        | 57.9 |
| BGH-R1235                                          | TCCCAGCATGCCTGCTATTGTC                 | 61.9 |

<sup>1</sup> pcDNA3.1 plasmid as template

<sup>2</sup> Plasmid with rhesus whole IgG1 gene as template

<sup>3</sup> Plasmid with rhesus whole IgK gene as template

<sup>4</sup> Plasmid with rhesus whole IgL gene as template

**Supplementary Table 4 Statistical analysis Raw p values and false discovery rate p values.**

| Figure    | Category | Test               | Comparison                  | Variable     | Compartment | Germline | Raw_P  | fdr_p  |
|-----------|----------|--------------------|-----------------------------|--------------|-------------|----------|--------|--------|
| Figure 2E | Homology | Wilcoxon           | AGM:HU vs AGM:RM            |              |             | V-Heavy  | 0.0000 | 0.0000 |
| Figure 2E | Homology | Wilcoxon           | AGM:HU vs AGM:RM            |              |             | V-Kappa  | 0.0000 | 0.0000 |
| Figure 2E | Homology | Wilcoxon           | AGM:HU vs AGM:RM            |              |             | V-Lambda | 0.0000 | 0.0000 |
| Figure 3B | Genomic  | Fisher's Exact     | HIV+/-: AGM vs HU           |              | All         |          | 0.0000 | 0.0000 |
| Figure 3B | Genomic  | Fisher's Exact     | HIV+/-: AGM vs RM           |              | All         |          | 0.3095 | 0.5364 |
| Figure 3B | Genomic  | Fisher's Exact     | HIV+/-: AGM vs HU           |              | BM          |          | 0.0037 | 0.0113 |
| Figure 3B | Genomic  | Fisher's Exact     | HIV+/-: AGM vs HU           |              | PBMC        |          | 0.0000 | 0.0000 |
| Figure 3B | Genomic  | Fisher's Exact     | HIV+/-: AGM vs RM           |              | PBMC        |          | 1.0000 | 1.0000 |
| Figure 3B | Genomic  | Fisher's Exact     | gp120+/-: AGM vs HU         |              | All         |          | 1.0000 | 1.0000 |
| Figure 3B | Genomic  | Fisher's Exact     | gp120+/-: AGM vs RM         |              | All         |          | 0.0014 | 0.0052 |
| Figure 3B | Genomic  | Fisher's Exact     | gp120+/-: AGM vs HU         |              | BM          |          | 0.5403 | 0.7236 |
| Figure 3B | Genomic  | Fisher's Exact     | gp120+/-: AGM vs HU         |              | PBMC        |          | 0.4375 | 0.6319 |
| Figure 3B | Genomic  | Fisher's Exact     | gp120+/-: AGM vs RM         |              | PBMC        |          | 0.0004 | 0.0018 |
| Figure 4  | Genomic  | Kolmogorov-Smirnov | ENV+ vs ENV-                | HCDR3_Length |             |          | 0.8996 | 1.0000 |
| Figure 4  | Genomic  | Wilcoxon           | ENV+ vs ENV-                | H_Mutated    |             |          | 0.6547 | 0.7738 |
| Figure 4  | Genomic  | Kolmogorov-Smirnov | gp120 vs Env cross-reactive | HCDR3_Length |             |          | 0.3934 | 0.6016 |
| Figure 4  | Genomic  | Exact Wilcoxon     | gp120 vs Env cross-reactive | H_Mutated    |             |          | 0.5566 | 0.7236 |
| Figure 4  | Genomic  | Kolmogorov-Smirnov | gp120 vs gp41               | HCDR3_Length |             |          | 0.9733 | 1.0000 |
| Figure 4  | Genomic  | Exact Wilcoxon     | gp120 vs gp41               | H_Mutated    |             |          | 0.0401 | 0.0745 |
| Figure 4  | Genomic  | Kolmogorov-Smirnov | gp41 vs Env cross-reactive  | HCDR3_Length |             |          | 0.6483 | 0.7738 |
| Figure 4  | Genomic  | Exact Wilcoxon     | gp41 vs Env cross-reactive  | H_Mutated    |             |          | 0.3369 | 0.5475 |



**Supplementary Table 5 % blocking by AGM gp120-specific ADCC mediating antibodies with undefined SIVsabgp120 fine-epitope specificity**

|              | % blocking |       |       |       |
|--------------|------------|-------|-------|-------|
|              | DH546      | DH550 | DH549 | DH552 |
| DH546-biotin | 73.9       | 0     | 0     | 17    |
| DH550-biotin | 0          | 35.4  | 48.6  | 6.9   |
| DH549-biotin | 0          | 19.7  | 57.3  | 5.1   |
| DH552-biotin | 22.7       | 0     | 3.6   | 53.23 |

**Supplementary Table 6 AGM and RM total B cell (CD3<sup>-</sup> CD20<sup>+</sup>) and memory B cell (CD20<sup>+</sup> IgD<sup>-</sup> CD27<sup>+</sup>) count (cells/ $\mu$ l) at week 45 post infection**

|     | animal ID | total B cell count (cells/ $\mu$ l) <sup>1</sup> | Mann-Whitney test | total memory B cell count (cells/ $\mu$ l) <sup>2</sup> | Mann-Whitney test |
|-----|-----------|--------------------------------------------------|-------------------|---------------------------------------------------------|-------------------|
| AGM | 013-89-10 | 220                                              | p = 0.07          | 118                                                     | p = 0.26          |
|     | 013-90-10 | 21                                               |                   | 8                                                       |                   |
|     | 013-91-10 | 36                                               |                   | 11                                                      |                   |
|     | 013-92-10 | 116                                              |                   | 59                                                      |                   |
|     | 013-93-10 | 12                                               |                   | 4                                                       |                   |
|     | 013-94-10 | 149                                              |                   | 83                                                      |                   |
| RM  | 206-96    | 289                                              |                   | 109                                                     |                   |
|     | 257-97    | 95                                               |                   | 40                                                      |                   |
|     | 402-98    | 662                                              |                   | 376                                                     |                   |
|     | 403-98    | 251                                              |                   | 66                                                      |                   |

<sup>1</sup> denotes CD3<sup>-</sup> CD20<sup>+</sup> cells

<sup>2</sup> denotes CD20<sup>+</sup> IgD<sup>-</sup> CD27<sup>+</sup>
